# Supplementary material for: Neighborhood Disadvantage and Active, Disabled and Total Life Expectancy Among Community-living Older Persons
Source: medRxiv preprint, doi:10.1101/2021.02.05.21251217, version 1 (2021-02-08)
Supplement: Table S1 [file 251217_file04.docx]

| **Table S1.** Indicators of the Area Deprivation Index at the Census-Block Level |
| --- |
| 1. Percentage of housing units without complete plumbing |
| 2. Percentage population aged ≥25 y with <9 years of education |
| 3. Percentage population aged ≥25 y with <12 years of education |
| 4. Percentage of employed persons aged ≥16 years with white collar occupation |
| 5. Median family income |
| 6. Income disparity |
| 7. Percentage civilian labor force aged ≥16 years |
| 8. Percentage of households with >1 person per room |
| 9. Median home value |
| 10. Median gross rent |
| 11. Median monthly mortgage |
| 12. Percentage occupied housing units |
| 13. Percentage families below the poverty level |
| 14. Percentage population <150% of poverty threshold |
| 15. Percentage of single‐parent household with children aged <18 years |
| 16. Percentage of households without motor vehicle |
| 17. Percentage of households without telephone |
